# Supplementary material
Source: Springer Nature journal article supplement (https://www.springermedizin.de/resource/supplementary/12967_2010_665_MOESM7_ESM.pdf/9577394)

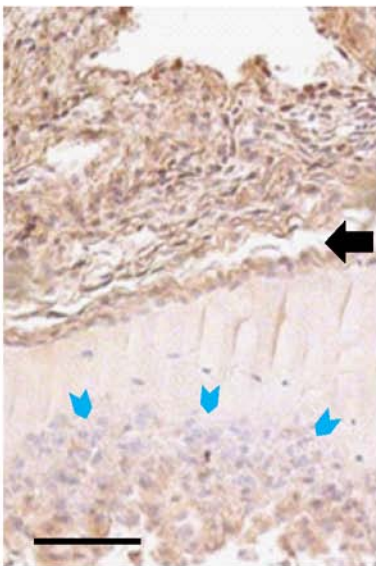

**VEGF**

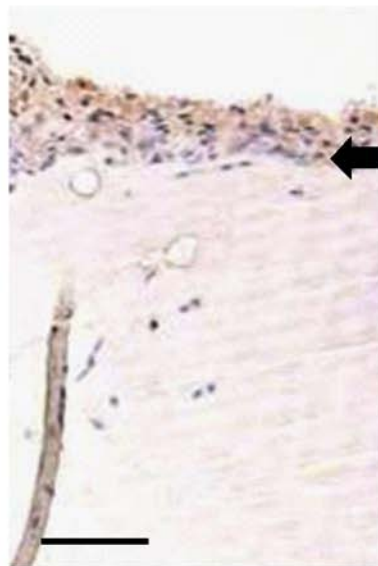

**VEGF  
+  
RGDechiHCit**

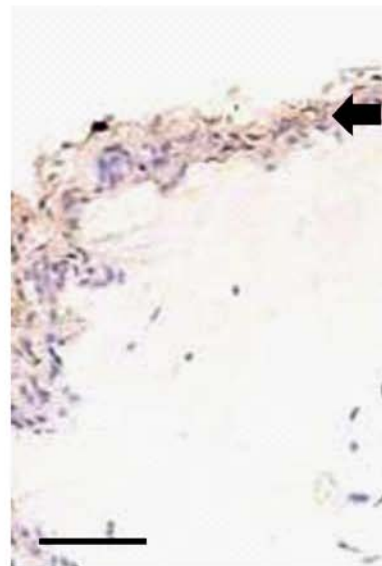

**VEGF  
+  
c(RGDf[NMe]V)**

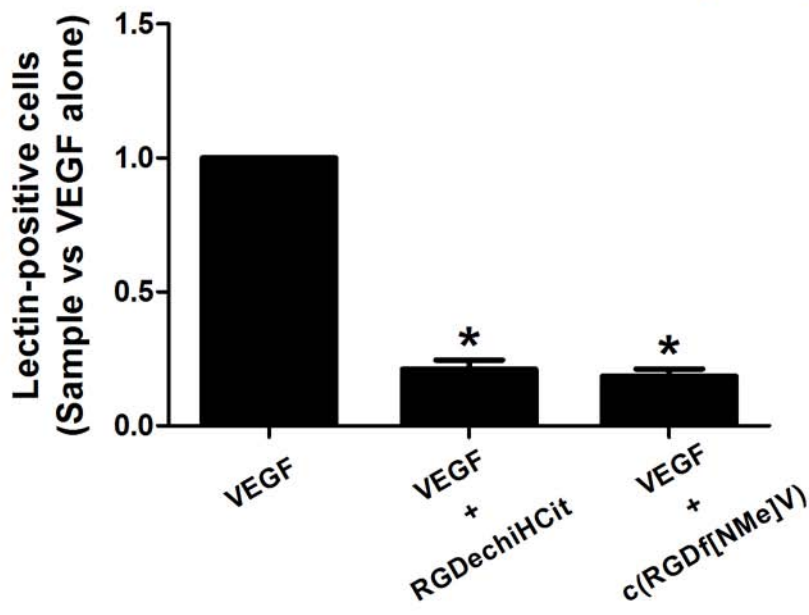

Supplement: MOESM7 [file 9577394]
